# Supplementary material
Source: PubMed Central journal article supplement (PMC4551455)

## **Supplemental Material**

Supplementary Table 1

- A) Primary CVD Prevention (39):
- B) Secondary CVD Prevention (13):

Supplementary Figure 1: Validity Assessment Tools:

Supplementary Figure 2: Funnel plot for CVD outcomes among primary and secondary prevention along with heart failure.

Supplementary Figure 3: Systolic Blood Pressure and DHI.

Supplementary Figure 4a: Total-Cholesterol and DHI.

Supplementary Figure 4b: LDL-Cholesterol and DHI.

**Table 1A) Primary CVD Prevention (39):**

| Study ID (Name, Year)           | Study Type | Study Length (mo) | Total (N) | Digital Health (N) | Study Population                 | Digital Health Intervention | Findings                                                                                                                                                                                                                                                              |
|---------------------------------|------------|-------------------|-----------|--------------------|----------------------------------|-----------------------------|-----------------------------------------------------------------------------------------------------------------------------------------------------------------------------------------------------------------------------------------------------------------------|
| Andersen 2013 <sup>34</sup>     | RCT        | 2.5               | 160       | 106                | Primary Prevention               | Email                       | Workplace email intervention with high adherence increased exercise capacity (1.45 mL/min/kg (95% CI 0.64-2.27) and reduced BP (4.81 mmHg (95% CI 0.47-9.16), (weight reduction not significant) especially those who started with a low fitness level to begin with. |
| Appel, 2011 <sup>26</sup>       | RCT        | 24                | 415       | 139                | Primary Prevention, Hypertension | Web-based                   | Larger, healthcare site obesity intervention delivered remotely or in person significantly reduced weight (-4.6 kg and -5.1 kg, respectively) above controls.                                                                                                         |
| Bennett, 2010 <sup>35</sup>     | RCT        | 3                 | 101       | 51                 | Primary Prevention               | Web-based                   | Healthcare delivery of weight loss intervention showed improved weight loss in a dose-dependent fashion (quartile 4 vs. 1: -4.16 kg; 95% CI -1.47, -6.84) over controls.                                                                                              |
| Bennett, 2012 <sup>36</sup>     | RCT        | 24                | 365       | 180                | Primary Prevention, Obesity      | Telemedicine and web-based  | Healthcare delivered weight loss intervention in underserved, primarily black population, showing a significant reduction in weight at 12 months (-1.03 kg 95% CI, -2.03 to -0.03 kg) with no effect on blood pressure.                                               |
| Bennett, 2013 <sup>37</sup>     | RCT        | 12                | 194       | 97                 | Primary Prevention, Obesity      | Telemedicine                | Healthcare delivered multi-faceted weight loss intervention in underserved, primarily black population, demonstrating significant weight reduction at 12 months (-1.4 kg; 95%CI, -2.8 to -0.1 kg; P = .04).                                                           |
| Bove, 2013 <sup>38</sup>        | RCT        | 6                 | 241       | 120                | Primary Prevention, Hypertension | Telephone, Web-based        | Healthcare-delivered telemedicine hypertension program in primarily underserved, African American women showed no additional improvement with intervention.                                                                                                           |
| Broekhuizen, 2010 <sup>39</sup> | RCT        | 12                | 340       | 181                | Primary Prevention               | Telephone, Web-based        | Healthcare-delivered, web-based lifestyle intervention in familial hyperlipidemia had no benefit over usual care.                                                                                                                                                     |
| Claes, 2013 <sup>40</sup>       | RCT        | 36                | 314       | 195                | Primary Prevention               | Telephone, Web-based        | Personalized online and one-to-one coaching with self-employed lawyers in Belgium showing similar reductions in FRS, cholesterol, and blood pressure.                                                                                                                 |
| Colkesen, 2011 <sup>41</sup>    | Cohort     | 7                 | 176       | 176                | Primary Prevention               | Web-based                   | Workplace-delivered HRA and prevention program improved 10-yr CVD risk scores after 6 mo by 5% with                                                                                                                                                                   |

|                              |        |      |       |      |                                        |                                         |                                                                                                                                                                                                                                                                          |
|------------------------------|--------|------|-------|------|----------------------------------------|-----------------------------------------|--------------------------------------------------------------------------------------------------------------------------------------------------------------------------------------------------------------------------------------------------------------------------|
|                              |        |      |       |      |                                        |                                         | more prominent reductions occurring in higher risk participants.                                                                                                                                                                                                         |
| Dekkers, 2011 <sup>42</sup>  | RCT    | 6    | 185   | 93   | Primary Prevention                     | Web-based                               | Workplace-delivered, internet-based primary prevention program showed non-significant reductions in body weight (-2.1 kg, 95%CI -4.4 to 0.2) and aerobic fitness (2.3 ml/kg/min, 95%CI -0.2 to 4.8).                                                                     |
| Frisch, 2009 <sup>43</sup>   | Cohort | 12   | 200   | 200  | Primary Prevention, Metabolic Syndrome | Telephone, Smart Phone, Data Monitoring | Transmission of weight data in overweight patients showed improvements in calorie restriction and weight reduction (5.8±6.1 kg and 4.3±5.1 kg).                                                                                                                          |
| Goessens, 2008 <sup>44</sup> | Cohort | 6    | 50    | 50   | Primary Prevention                     | Web-based                               | Nurse-led internet-based risk factor reduction program was scarcely used (1.3 log ins/wk) with a relative reduction in risk factors, but no specific surrogate CVD marker data reported.                                                                                 |
| Green, 2009 <sup>30</sup>    | RCT    | 12   | 778   | 520  | Primary Prevention                     | Telephone, Web-based                    | Hypertensive patients assigned to usual care vs. a web-based or telephone-based intervention showed those using the web-based platform had a greater percentage of achieving target BP (56%; 95% CI, 49%-62%; P < .001). Increased adverse events in intervention group. |
| Hansen, 2012 <sup>45</sup>   | RCT    | 3    | 12287 | 6055 | Primary Prevention                     | Web-based, Email                        | Population health intervention of internet-based lifestyle changes showed poor compliance (22%) and no increase in physical activity (1575; 845-2580 vs. 1560; 840-2520).                                                                                                |
| Jacobs, 2011 <sup>46</sup>   | RCT    | 6    | 314   | 208  | Primary Prevention                     | Telephone, Web-based, Email             | A multi-faceted digital health intervention in highly educated participants showed no difference versus usual care in terms of lifestyle behaviors or CVD surrogates                                                                                                     |
| Joo, 2007 <sup>47</sup>      | Cohort | 3    |       |      | Primary Prevention                     | SMS text                                | Cohort using a population health SMS text intervention showed reductions of weight (1.6 kg; P<0.001), waist circumference (4.3 cm; P<0.001), and BMI (0.6 kg/m <sup>2</sup> ; P< 0.001), respectively.                                                                   |
| Kim, 2013 <sup>48</sup>      | Cohort | 2    | 18    | 18   | Primary Prevention                     | Web-based                               | Small, cohort, workplace, pilot study to improve physical activity showed significant reductions in Framingham CVD risk (-2.4%), waist circumference (-2.9 cm), diastolic blood pressure (-9.9 mm Hg), and fasting plasma glucose (-16.7 mg/dL).                         |
| Kiselev, 2012 <sup>49</sup>  | RCT    | 17.6 | 199   | 97   | Primary Prevention, Hypertensi         | Web-based, Email, SMS text              | Healthcare-guided SMS intervention in hypertensive patients had a relatively high withdrawal rate (36%) but showed a 5-fold improvement in adherence to ideal BP                                                                                                         |

|                                       |        |    |     |     |                                  |                                             |                                                                                                                                                                                                                                                                                                                                   |
|---------------------------------------|--------|----|-----|-----|----------------------------------|---------------------------------------------|-----------------------------------------------------------------------------------------------------------------------------------------------------------------------------------------------------------------------------------------------------------------------------------------------------------------------------------|
|                                       |        |    |     |     | on                               |                                             | (77%) compared to control group.                                                                                                                                                                                                                                                                                                  |
| Kulick, 2013 <sup>50</sup>            | RCT    | 3  | 61  | 32  | Primary Prevention               | Web-based, Email                            | Three-month healthcare-delivered internet and email-based intervention showed improvements with both diet scores and lipids with the digital health intervention and high-intensity counseling without apparent differences between the two.                                                                                      |
| Lieber, 2012 <sup>51</sup>            | Cohort | 3  | 972 | 972 | Primary Prevention               | Web-based                                   | Population-based, web-based intervention showed an improvement in physical activity in low-moderate risk female participants.                                                                                                                                                                                                     |
| Logan, 2012 <sup>52</sup>             | RCT    | 12 | 110 | 55  | Primary Prevention, Diabetes/Htn | Telephone, Email, SMS text, Data Monitoring | Diabetic and hypertensive patients provided data monitoring and an automated educational system had significantly reduced SBP from baseline (9.1±15.6 mmHg; P < 0.0001), and compared to telemonitoring alone (7.1±2.3 mmHg; P < 0.005). There was more pronounced depression and antihypertensive effects in the treatment arms. |
| Lombard, 2010 <sup>53</sup>           | RCT    | 12 | 250 | 127 | Primary Prevention               | SMS text                                    | Young urban women with young children in Australia cluster randomized to support group and SMS texting intervention. Those in the treatment group lost weight (-0.2 kg; -0.90 to 0.49) compared to the control group who gained weight (+0.83 kg; 0.12 to 1.54), however the response rate was only 12%.                          |
| Marquez Contreras, 2004 <sup>54</sup> | RCT    | 6  | 104 | 52  | Primary Prevention, Hypertension | SMS text                                    | Healthcare intervention on clinics in Spain showed SMS text reminders for hypertension had no significant improvement in medication compliance and attainment of target BP goals over control for 6 months.                                                                                                                       |
| McManus, 2010 <sup>19</sup>           | RCT*   | 12 | 527 | 263 | Primary Prevention, Hypertension | Telephone, Data Monitoring                  | Unblinded, open-label data monitoring and telemedicine RCT showed significant improvement in antihypertensive effects in both arms of the program (difference between groups 3.7 mm Hg, 0.8-6.6; p=0.013).                                                                                                                        |
| McTigue, 2009 <sup>55</sup>           | Cohort | 12 | 50  | 50  | Primary Prevention, Obesity      | Web-based, Email                            | Clinic-based, multifaceted cohort study in patients with obesity showed significant reductions in SBP (7.33±11.36 mm Hg) and weight (4.79±8.55 kg) with reasonably high compliance.                                                                                                                                               |
| Nolan, 2011 <sup>56</sup>             | RCT    | 6  | 680 | 415 | Primary Prevention               | Telephone                                   | Clinical setting with participants at high risk of CVD demonstrating that telephone intervention reduces blood pressure, lipids, and 10 year CVD risk through improvements in physical activity and diet.                                                                                                                         |

|                               |        |    |     |     |                                  |                                  |                                                                                                                                                                                                                                                                                                                                                                      |
|-------------------------------|--------|----|-----|-----|----------------------------------|----------------------------------|----------------------------------------------------------------------------------------------------------------------------------------------------------------------------------------------------------------------------------------------------------------------------------------------------------------------------------------------------------------------|
| Nolan, 2012 <sup>57</sup>     | Cohort | 4  | 387 | 194 | Primary Prevention, Hypertension | Web-based, Email                 | Initially a clinic-based RCT for antihypertensive treatment through an online portal diluted by crossover of patients, essentially rendering a cohort study finding no differences between the two groups; however in those participants who received over 8 messages throughout the trial had substantial benefit in blood pressure, lipids, and 10-yr risk scores. |
| Park, 2012 <sup>58</sup>      | Cohort | 3  | 79  | 42  | Primary Prevention               | Web-based, SMS text              | Clinic-based observational study in overweight, post-menopausal women compared to a similar cohort had significant reductions in waist circumference (3.0 cm) weight (2 kg), blood pressure (6.5/4.6 mmHg), and LDL-C (-11.3 mg/dL).                                                                                                                                 |
| Rossi, 2009 <sup>59</sup>     | Cohort | 3  | 50  | 50  | Primary Prevention, Diabetes     | SMS text, Smart Phone            | Smart-Phone application studied in a cohort of overweight participants in Italy showed significant improvements in diet, moderate physical activity, weight (-2.5 kg; -3.2, -1.8), waist circumference (-3.7 cm; -4.6, -2.9), and BMI (-1.0; -0.7, -1.2) kg/m <sup>2</sup> with 82% adherence.                                                                       |
| Rossi, 2010 <sup>60</sup>     | Cohort | 5  | 140 | 140 | Primary Prevention               | Telephone, SMS text, Smart Phone | Clinic-based feasibility study utilizing a smart phone application to assist type 1 diabetics in managing glucose levels and insulin dosing showed reductions in fasting plasma glucose (-6.7%), but not HbA1c, without adverse events.                                                                                                                              |
| Senesael, 2013 <sup>61</sup>  | RCT    | 6  | 57  | 26  | Primary Prevention               | Email                            | Clinic-based study in patients at moderate risk for CVD showed similar reductions in BP in both groups, and no further changes in other surrogate CVD markers after 6 mo.                                                                                                                                                                                            |
| Sheridan, 2011 <sup>21</sup>  | RCT*   | 3  | 160 | 81  | Primary Prevention               | Web-based                        | Clinic-based primary prevention intervention using an online decision aid and adherence messages with high retention (96%) reduced CVD risk scores -1.1% (-0.16%, -2%), especially in higher risk subgroups.                                                                                                                                                         |
| Stuckey, 2011 <sup>62</sup>   | Cohort | 2  | 24  | 24  | Primary Prevention               | Smart Phone, Data Monitoring     | Clinic-based data monitoring intervention in overweight patients in underserved communities showed significant reductions in physical activity, diet, BMI, blood pressure, and lipids.                                                                                                                                                                               |
| Thiboutot, 2013 <sup>63</sup> | RCT    | 12 | 500 | 282 | Primary Prevention               | Web-based                        | Clinic-based trial encouraging patients to discuss certain lifestyle and preventative measures with their PCPs. There were no changes in blood pressure after 12 months, and only slight adjustments in interactions with PCPs.                                                                                                                                      |

|                                |        |    |     |     |                    |                        |                                                                                                                                                                                                                                  |
|--------------------------------|--------|----|-----|-----|--------------------|------------------------|----------------------------------------------------------------------------------------------------------------------------------------------------------------------------------------------------------------------------------|
| Verheijden, 2004 <sup>64</sup> | RCT    | 8  | 146 | 73  | Primary Prevention | Web-based              | Clinically based web intervention in 73 higher-risk Canadian patients demonstrating no difference in weight, blood pressure, or lipids. Very low uptake of the program.                                                          |
| Wakefield, 2011 <sup>65</sup>  | RCT    | 12 | 302 | 195 | Primary Prevention | Telephone              | 302 US war veterans with hypertension and diabetes randomized to intensive home reporting system showed no change in HbA1c between groups and only a difference between control and high-intervention groups for blood pressure. |
| Widmer, 2014 <sup>66</sup>     | Cohort | 3  | 508 | 462 | Primary Prevention | Web-based, Smart Phone | Workplace-generated single-site observational study demonstrating further surrogate Framingham CVD risk reduction (-0.6±0.1%) in a low-risk population of primarily younger females.                                             |
| Wister, 2007 <sup>17</sup>     | RCT    | 12 | 296 | 153 | Primary Prevention | Telephone              | 611 divided into primary and secondary prevention randomized for 12 months demonstrating only a significant change in Framingham 10 year CVD risk.                                                                               |
| Wong, 2013 <sup>67</sup>       | RCT    | 12 | 104 | 54  | Primary Prevention | SMS text               | Workplace SMS intervention on reducing the incidence of diabetes in primarily inactive, men showing a reduced risk of disease development (RR = 0.35; 95% CI: 0.10-1.24).                                                        |

### B) Secondary CVD Prevention (13):

| Study ID (Name, Year)        | Study Type | Study Length (mo) | Total N | Digital Health N | Study Population                    | Digital Health Intervention      | Findings                                                                                                                                                                                                                         |
|------------------------------|------------|-------------------|---------|------------------|-------------------------------------|----------------------------------|----------------------------------------------------------------------------------------------------------------------------------------------------------------------------------------------------------------------------------|
| Blasco 2012 <sup>27</sup>    | RCT        | 12                | 203     | 102              | Secondary Prevention                | SMS text, Smart Phone            | Healthcare secondary prevention trial showing improved secondary prevention outcomes (repeat CVD events, rehospitalizations, or all-cause mortality; RR = 1.4; 95% CI = 1.1-1.7) with telemonitoring and SMS text.               |
| Dendale, 2012 <sup>28</sup>  | RCT        | 6                 | 160     | 80               | Secondary Prevention, Heart Failure | Telephone, Data Monitoring       | Healthcare-delivered telemonitoring service in HF patients showed significantly reduced all-cause mortality (5% vs. 17.5%, P = 0.01) and non-significant improvements in hospitalizations per patient (0.24 vs. 0.42, P = 0.06). |
| Frederix, 2013 <sup>29</sup> | RCT        | 4.5               | 80      | 40               | Secondary Prevention                | Email, SMS text, Data Monitoring | Body sensor in CR patients improved exercise capacity (26.88+220.33 ml/min vs. 285.89+385.44 ml/min, P= 0.014) and a non-significant improvements in rehospitalizations.                                                         |

|                                          |        |    |     |     |                                     |                                       |                                                                                                                                                                                                                                                                                                  |
|------------------------------------------|--------|----|-----|-----|-------------------------------------|---------------------------------------|--------------------------------------------------------------------------------------------------------------------------------------------------------------------------------------------------------------------------------------------------------------------------------------------------|
| Korzeniowska-Kubacka, 2011 <sup>68</sup> | Cohort | 2  | 62  | 32  | Secondary Prevention                | Telephone, Data Monitoring            | Data monitoring in post-MI patients showed no significant difference in aerobic exercise parameters compared to control group with both groups significantly improving above baseline.                                                                                                           |
| Lee, 2013 <sup>69</sup>                  | RCT    | 3  | 60  | 30  | Secondary Prevention                | Telephone, Web-based, Data Monitoring | Data monitoring in post-MI patients showed significant improvements in aerobic activity metrics compared to usual care; however no change in resting blood pressure, and no other outcomes or metrics reported.                                                                                  |
| Maric, 2010 <sup>70</sup>                | Cohort | 6  | 20  | 20  | Secondary Prevention, Heart Failure | Web-based                             | Recently hospitalized HF patients utilized data monitoring through a web portal showing non-significant improvements in QOL, surrogate markers (BNP), and 6MWT.                                                                                                                                  |
| Reid, 2012 <sup>31</sup>                 | RCT    | 12 | 223 | 115 | Secondary Prevention                | Web-based                             | Internet-based data monitoring for physical activity in post-MI patients showed significant improvements in physical activity and QOL compared to usual care. The intervention had a small, non-significant effect on hard CVD outcomes.                                                         |
| Scherr, 2009 <sup>20</sup>               | RCT*   | 6  | 120 | 54  | Secondary Prevention, Heart Failure | Telephone, SMS text, Data Monitoring  | Data monitoring in patients with recent decompensated HF showed a high attrition rate; yet a 50% reduction in CVD endpoints and hospitalizations with a mean improvement in NYHA class by one category in the treatment group.                                                                   |
| Southard, 2003 <sup>32</sup>             | RCT    | 6  | 104 | 53  | Secondary Prevention                | Web-based                             | Internet-based secondary prevention tool reduced CVD endpoints (15.7% vs. 4.6%) and provided a significant cost savings. The intervention group had a more robust weight loss (-3.68 lbs. vs. 0.47 pounds, P = .003), with no other surrogate markers of CVD achieving statistical significance. |
| Theissing, 2013 <sup>71</sup>            | RCT    | 3  | 164 | 58  | Secondary Prevention                | Web-based                             | Online, clinic-based intervention in obese patients showed substantial improvements in lifestyle behaviors related to diet, however no significant differences between the group for waist circumference and weight.                                                                             |
| Vernooij, 2012 <sup>33</sup>             | RCT    | 12 | 330 | 164 | Secondary Prevention                | Web-based                             | Clinic-based online risk factor improvement tool showed a significant reduction in Framingham scores (-14%; -25% to -2%) after 12 months in patients randomized to the intervention.                                                                                                             |
| Wister, 2007 <sup>17</sup>               | RCT    | 12 | 296 | 153 | Primary                             | Telephone                             | 611 divided into primary and secondary prevention                                                                                                                                                                                                                                                |

|                          |     |   |    |   |                      |           |                                                                                                                                                                                             |
|--------------------------|-----|---|----|---|----------------------|-----------|---------------------------------------------------------------------------------------------------------------------------------------------------------------------------------------------|
|                          |     |   |    |   | Prevention           |           | randomized for 12 months demonstrating only a significant change in Framingham 10 year CVD risk.                                                                                            |
| Zutz, 2007 <sup>72</sup> | RCT | 3 | 15 | 8 | Secondary Prevention | Web-based | Small, hospital-based RCT testing "virtual CR" in patients with a primary indication for such. Although user feedback was positive, there were no significant benefits to the intervention. |



# Supplementary Figure 1: Validity Assessment Tools:

- Patient Type
- primary prevention
  - secondary prevention
  - heart failure
  - diabetes
  - metabolic syndrome
  - hypertension

- mHealth Intervention
- telemedicine
  - web-based
  - email
  - SMS text
  - smart-phone
  - data-monitoring
  - non-mhealth

Study Length (months) \_\_\_\_\_

- Study Type
- RCT
  - Observational/Cohort
  - Case Control
  - Case Series
  - Unknown

Percent of approached patients enrolled \_\_\_\_\_

## RCT Quality Assessment

- Blinding
- single
  - double
  - non-blinded

- Random Sequence Generation
- Yes
  - No

- Allocation (to test groups) concealment (selection bias)
- Yes
  - No

- Blinding of participants
- Yes
  - No

- Blinding of study personnel
- Yes
  - No

- Blinding of outcome assessment
- Yes
  - No

- Similar baseline characteristics
- Yes
  - No

Percent Loss to Follow Up \_\_\_\_\_

- Selective Reporting
- ITT
  - Per Protocol
  - Unknown

- Incentives Offered?
- Yes
  - No

- Are results likely to be similar across the range of patients included (older/younger, sicker)?
- Yes
  - No

- Are results likely to be similar across the range of interventions or exposures studied (higher/lower dose)?
- Yes
  - No

- Are results likely to be similar across the range of ways the outcome was measured (shorter v. longer follow up)?
- Yes
  - No

## Cohort Study Quality Assessment

- Is the case definition adequate?
- Yes
  - No

- Representativeness of the exposed cohort
- Obviously representative series of cases
  - Somewhat representative
  - Selected group
  - No description

- Control Selection
- Similar community
  - Non-similar community
  - No mention

- Definition of Controls
- No h/o disease
  - h/o disease

- Comparability of cases and controls on the basis of the design or analysis, eg study controls for differences in groups?
- Yes
  - No

- Ascertainment of outcome
- blinded, secure record
  - record linkage
  - self report
  - no description

- Adequacy of follow up?
- Yes
  - No

- Adequacy of follow up of cohorts
- Complete follow up - all subjects accounted for
  - Subjects lost to follow up unlikely to introduce bias; small number lost
  - Follow up rate adequate and/or no description of those lost
  - no statement

- Author Contact Returned?
- Yes
  - No

- Data additions/changes?
- Yes
  - No

**Supplementary Figure 2:** Funnel plot for CVD outcomes.

Supplementary Figure 2.

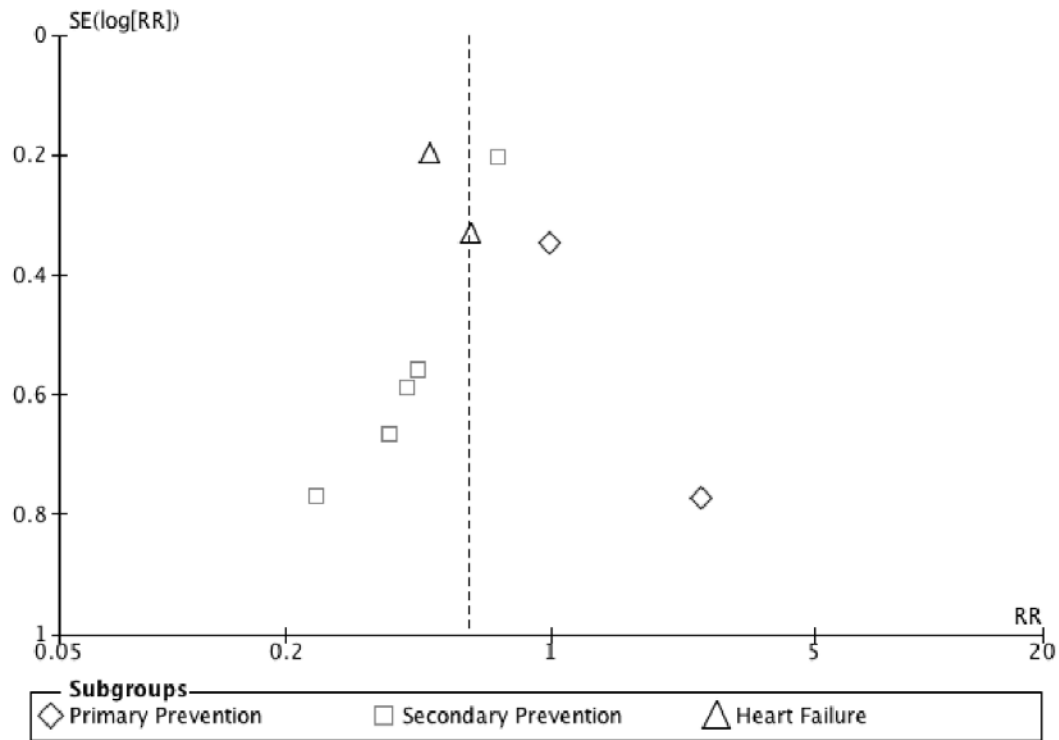

### Supplementary Figure 3: Systolic Blood Pressure and DHI.

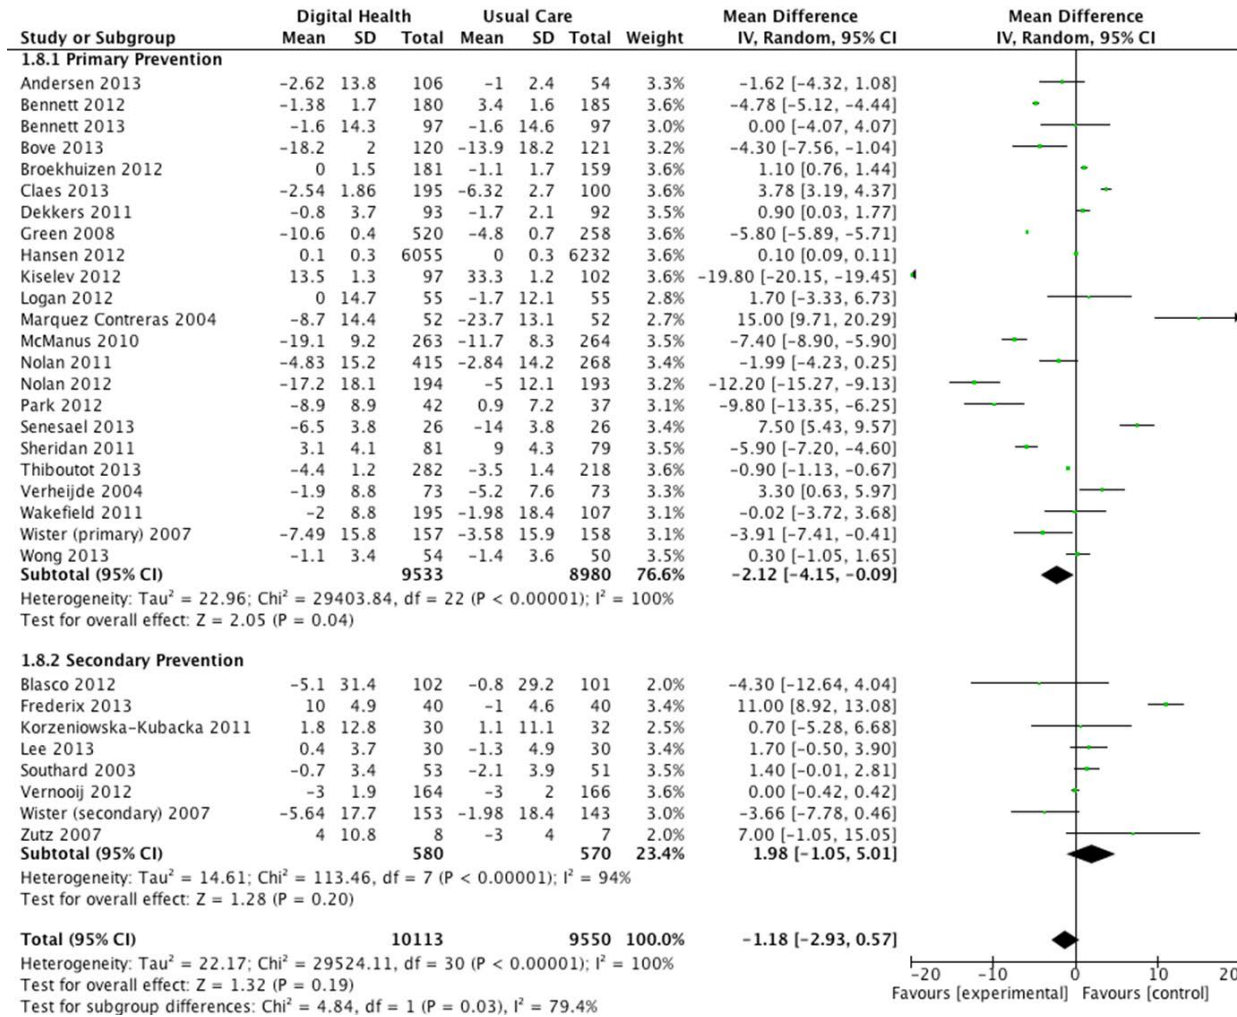

Supplementary Figure 4a: Total-Cholesterol and DHI.

## Supplementary Figure 4a.

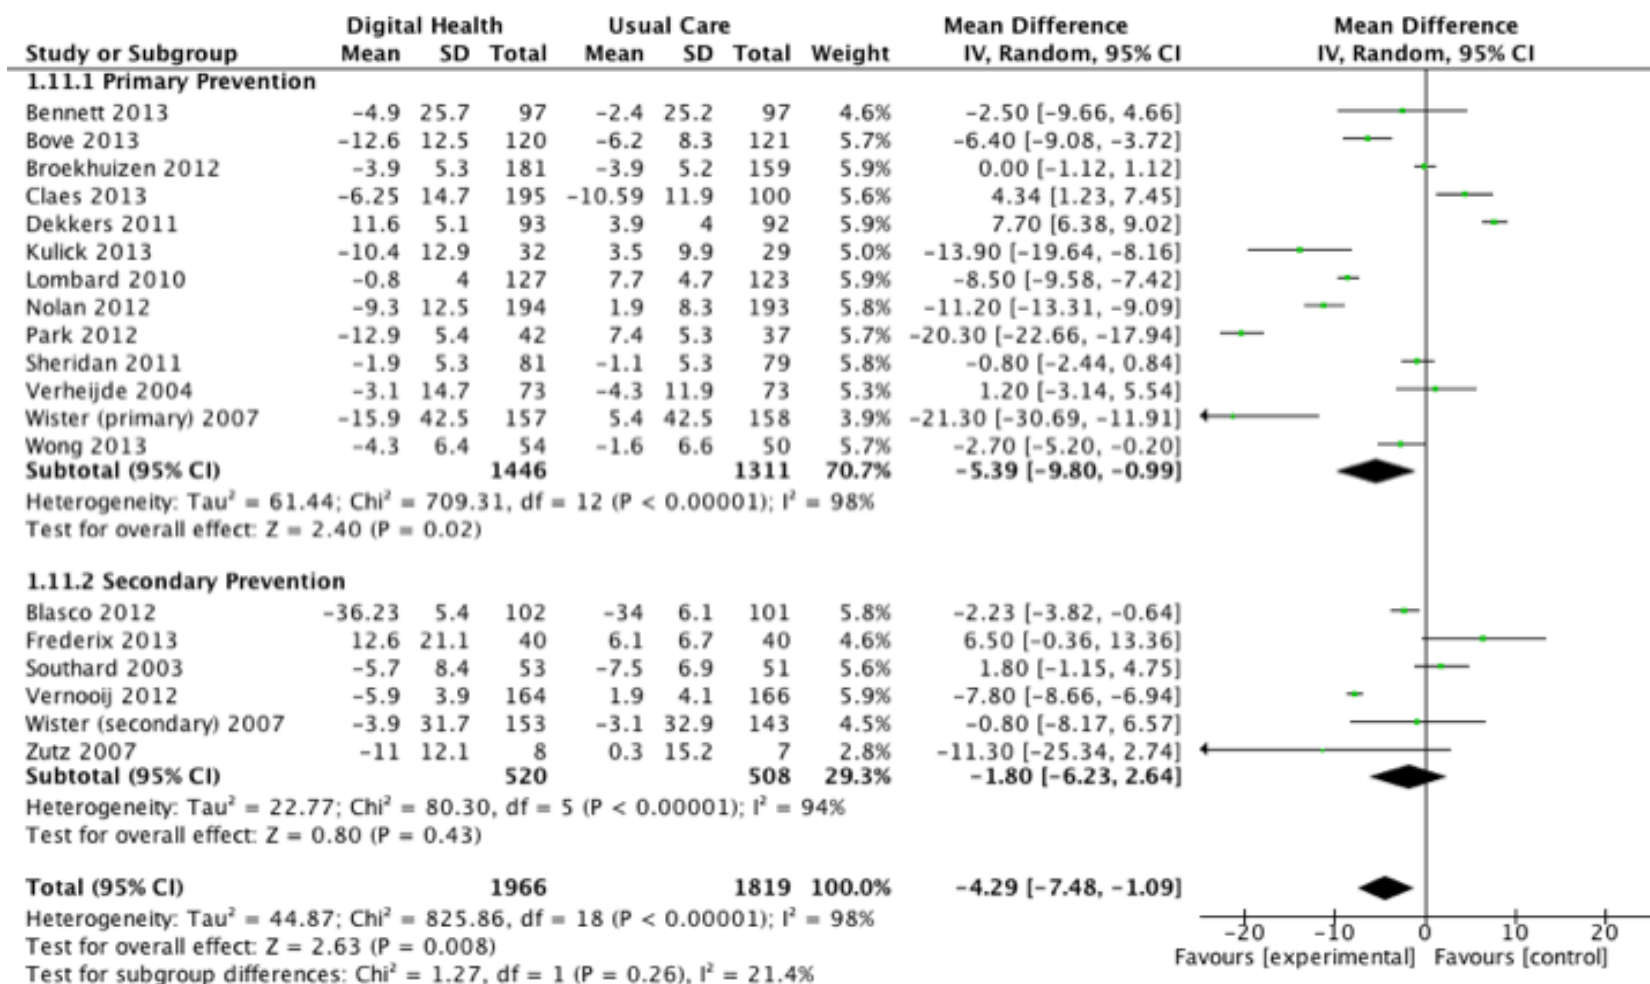

Supplementary Figure 4b: LDL-Cholesterol and DHI.

Supplementary Figure 4b.

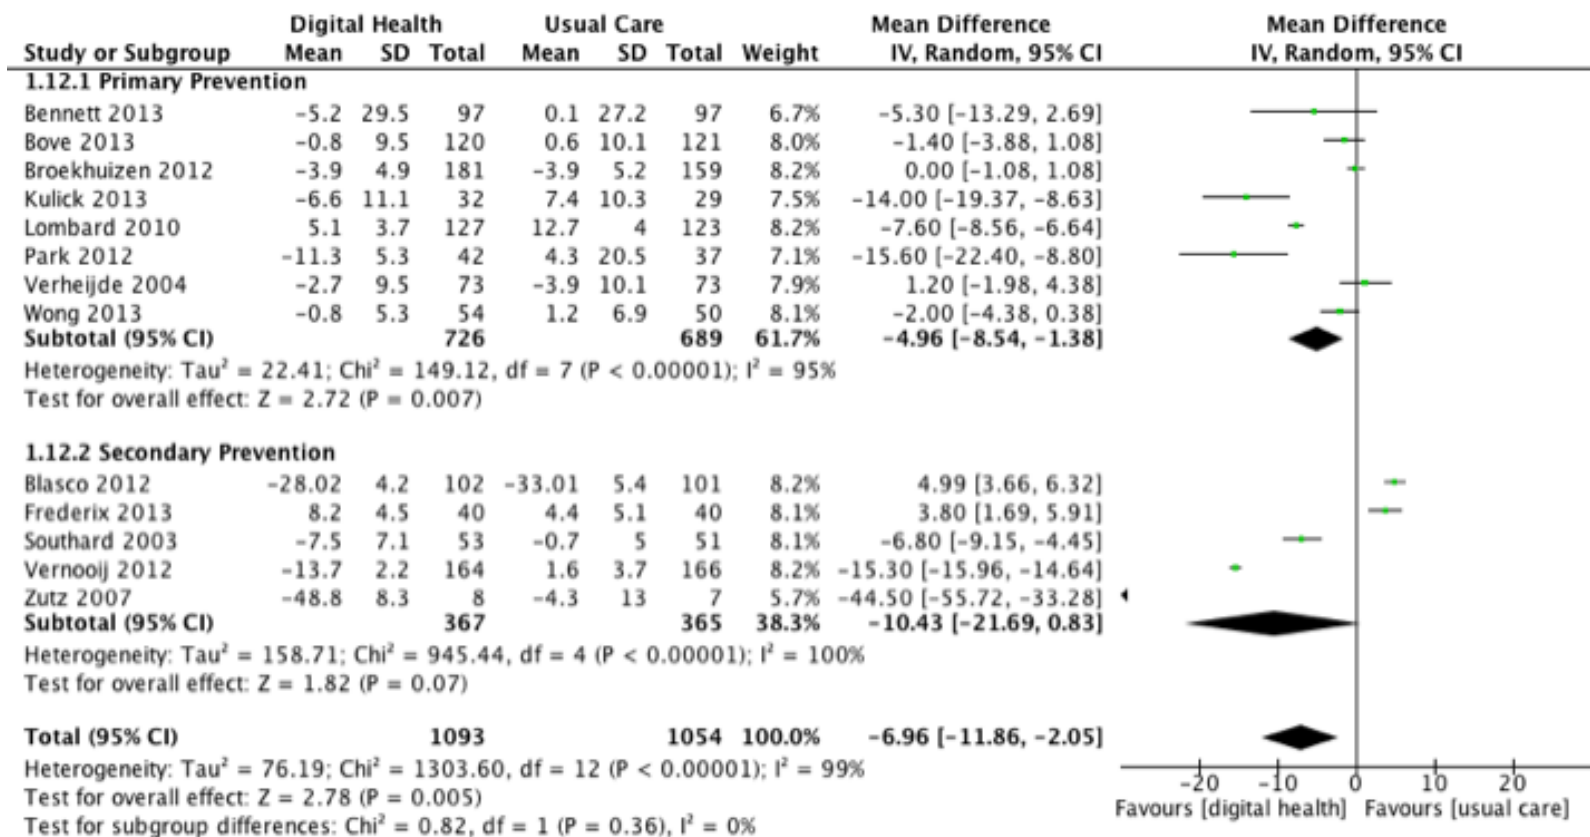

Supplement: NIHMS715520-supplement.pdf [file NIHMS715520-supplement.pdf]
